# Supplementary material for: Clockwise Anterior-to-Posterior—Double Isolation (CAP-DI) Approach for Portal Lymphadenectomy in Biliary Tract Cancer: Technique, Yield, and Outcomes
Source: MDPI journal article supplement (doi:10.3390/cancers14235770), 2022-11-24
Supplement: s1 [file s1]

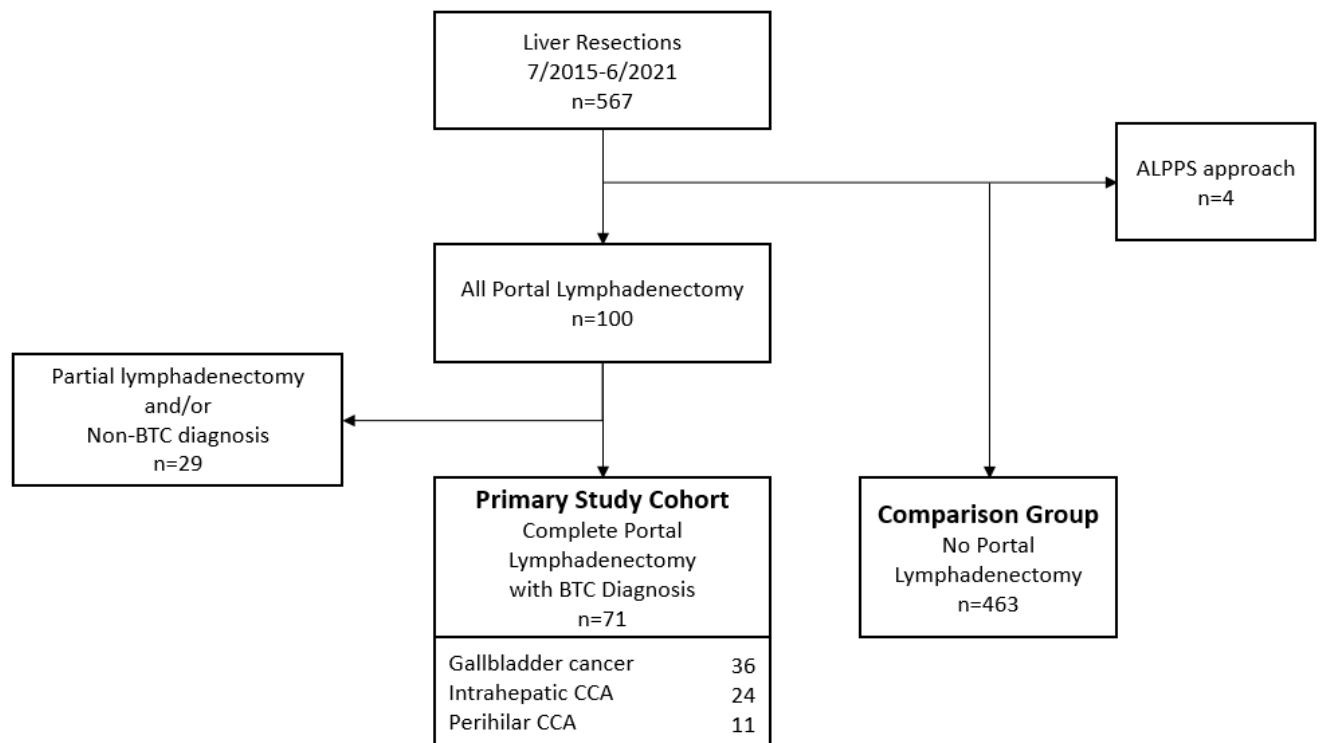

**Supplemental Figure S1.** STROBE cohort selection

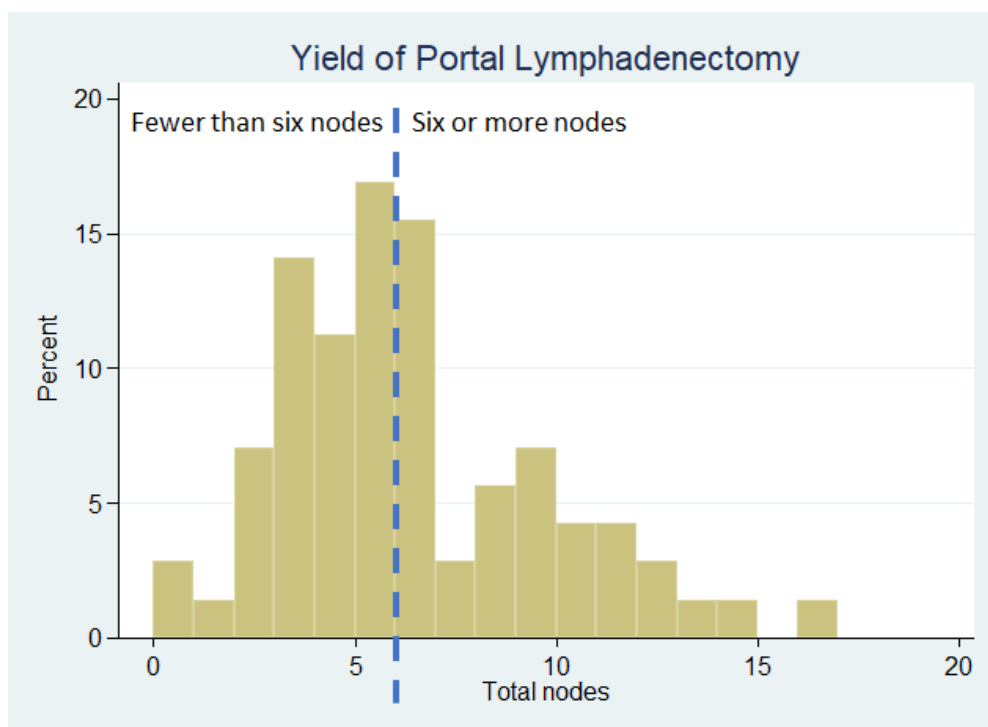

**Supplemental Figure S2.** Yield of portal lymphadenectomy. Median number of nodes retrieved was 5
